# Supplementary material
Source: PubMed Central journal article supplement (PMC5177455)
Supplement: NIHMS831629-supplement-Supplementary_Figure_1.pdf [file NIHMS831629-supplement-Supplementary_Figure_1.pdf]

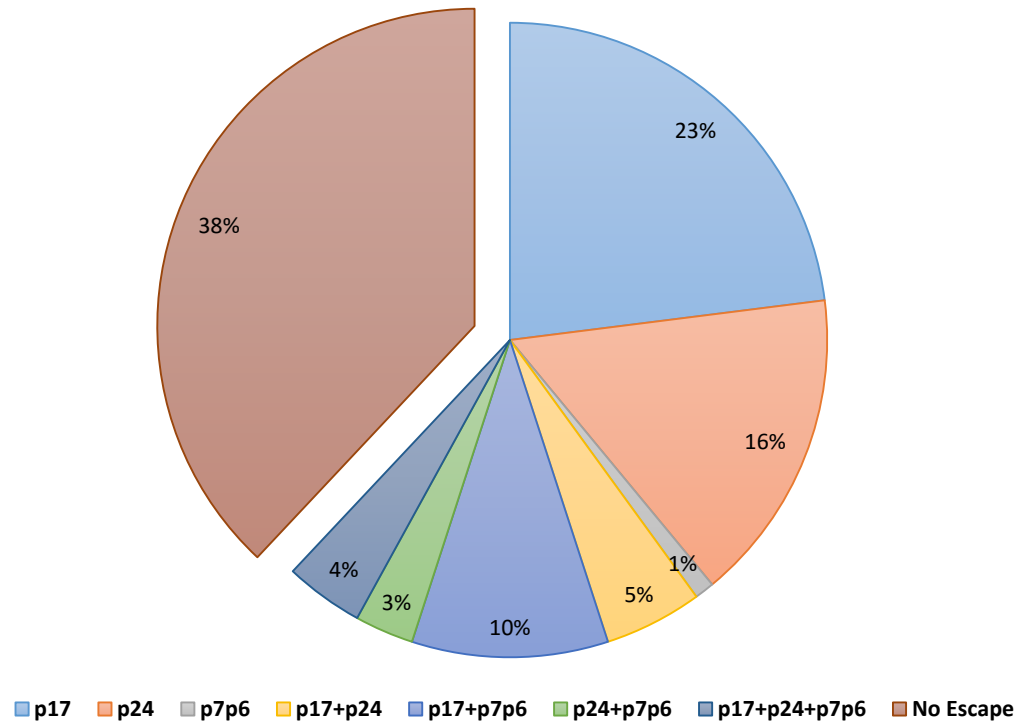

**Supplementary Figure 1:** Distribution of CTL escape mutations according to Gag proteins showing frequency of study participants.
